# Supplementary material for: Arabidopsis MORC proteins function in the efficient establishment of RNA directed DNA methylation
Source: PubMed Central journal article supplement (PMC8277788; doi:10.1038/s41467-021-24553-3), 2021-07-13
Supplement: 41467_2021_24553_MOESM1_ESM.pdf [file 41467_2021_24553_MOESM1_ESM.pdf]

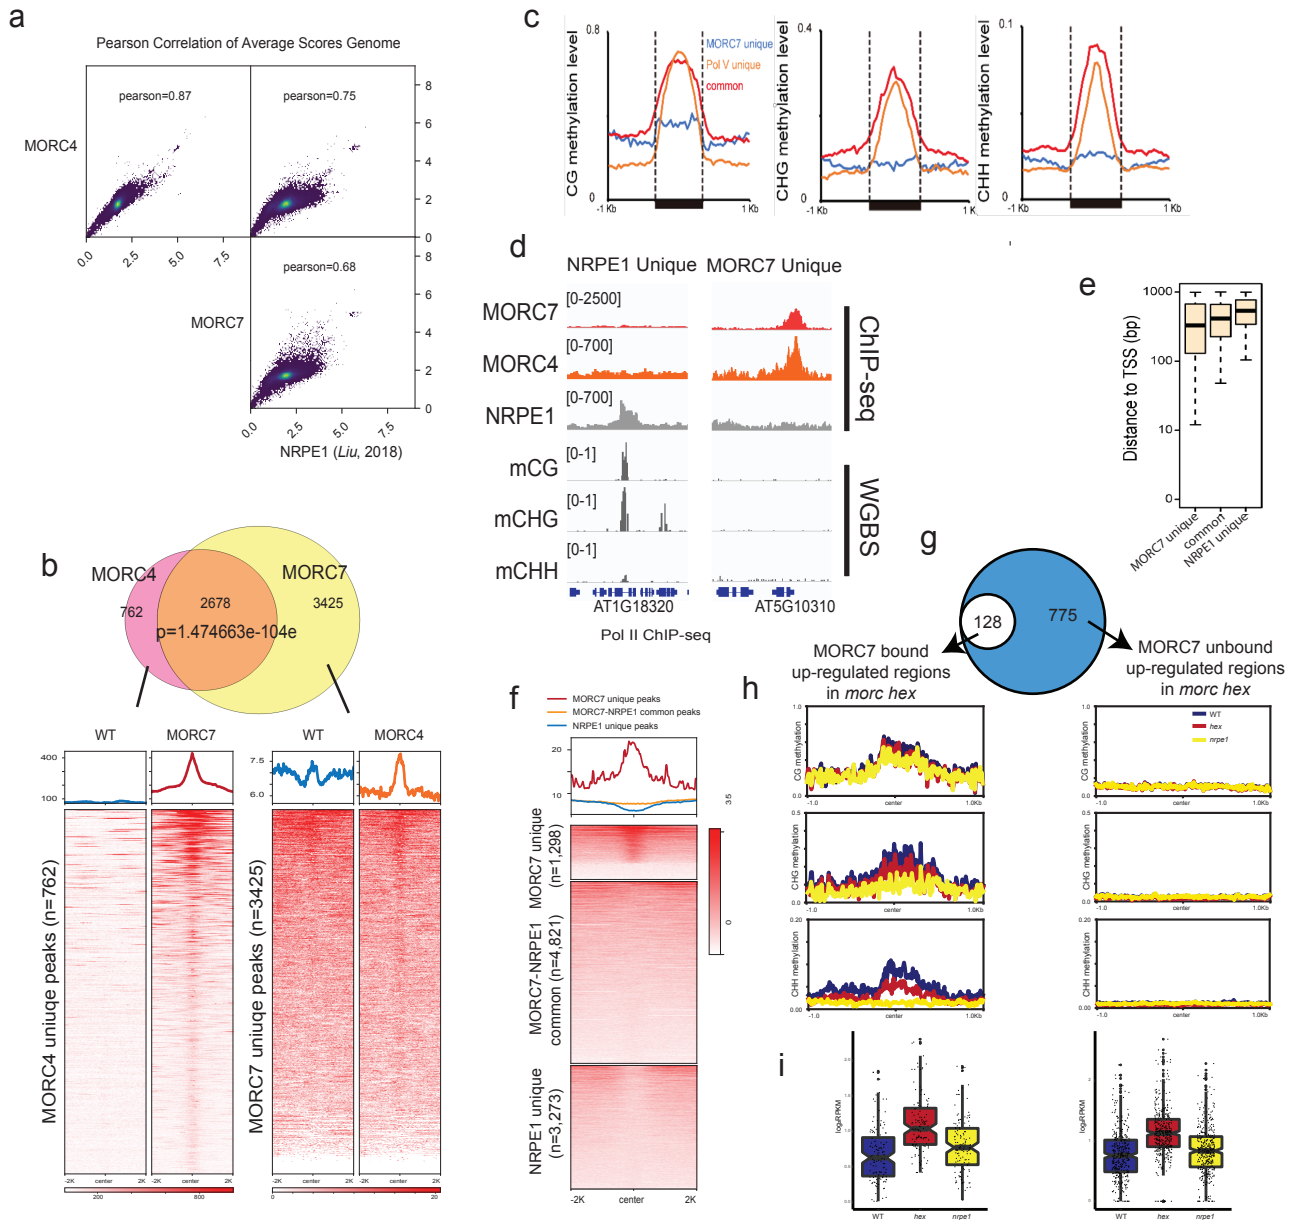

**Supplementary Fig. 1. MORC4 and MORC7 chromatin localization, related to Figure 1.** **a** Pearson correlation of MORC4-FLAG, MORC7-FLAG and NRPE1 ChIP-seq. **b** Overlap between MORC4 and MORC7 binding sites (top) ( $p = 1.474663e-104e$ , Hypergeometric test), enrichment of MORC4 and MORC7 ChIP signals (RPKM sample/control) over MORC7 and MORC4 specific regions respectively (bottom). **c** Enrichment of CG (left panel), CHG (middle panel) and CHH (right panel) DNA methylation over MORC7 unique (blue), MORC7-NRPE1 common (red) and NRPE1 unique (orange) peaks. **d** Screenshot of a representative locus of NRPE1 unique (left) and MORC7 unique peak (right). **e** Boxplot showing the distance of MORC7 unique, MORC7-NRPE1 common and NRPE1 unique peaks to the transcription start site (TSS) of the nearest gene. **f** Profile and heatmap of Pol II ChIP signals (RPKM sample/control) over MORC7 unique, MORC7-NRPE1 common and NRPE1 unique peaks. **g** Venn diagram showing regions that are upregulated in *hex*. Regions that have MORC7 bound within 1Kb (MORC7 bound) are in light blue (n=128) and regions that are MORC7 unbound are in dark blue (n=775). **h** DNA methylation over MORC7 bound regions (left) and MORC7 unbound regions (right). **i** Expression (log<sub>2</sub>RPKM) over the MORC7 bound (left) and MORC7 unbound (right) regions in WT (blue), *hex* (red) and *nrpe1* (yellow).

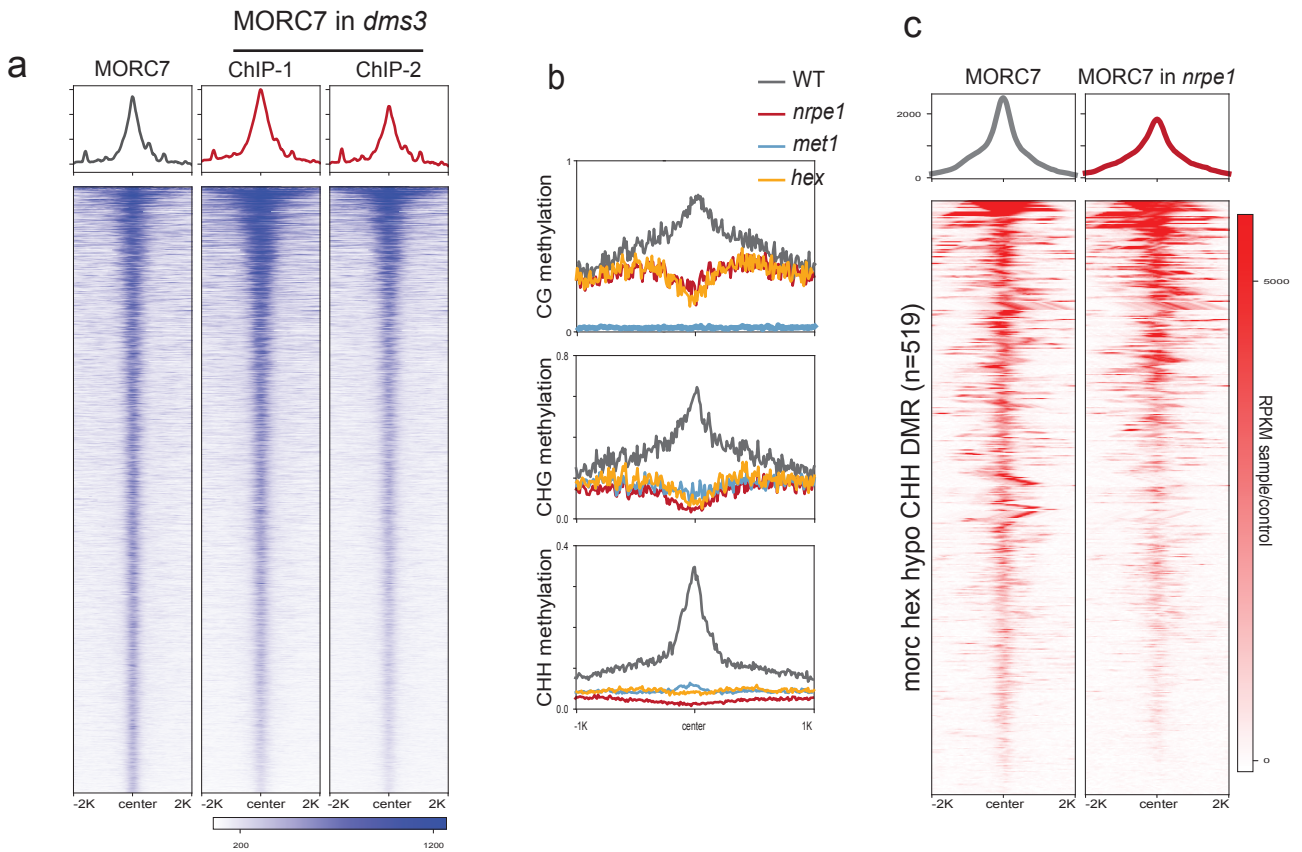

**Supplementary Fig. 2. MORC7 binding in *dms3-4* and over *morc hex* hypo-CHH DMRs (fragile sites), related to Figure 2. **a** Enrichment of MORC7 ChIP signals (biological replicate of Fig. 2d) (RPKM sample/control) in *dms3* (right) and its corresponding WT control (left). **b** Methylation level over the *hex* hypo-CHH DMRs in WT (grey), *hex* (orange), *nrpe1* (red) and *met1* (blue) (n = 519). **c** Enrichment of MORC7 ChIP signal (RPKM sample/control) over the same *hex* hypo-CHH DMR in **b**.**

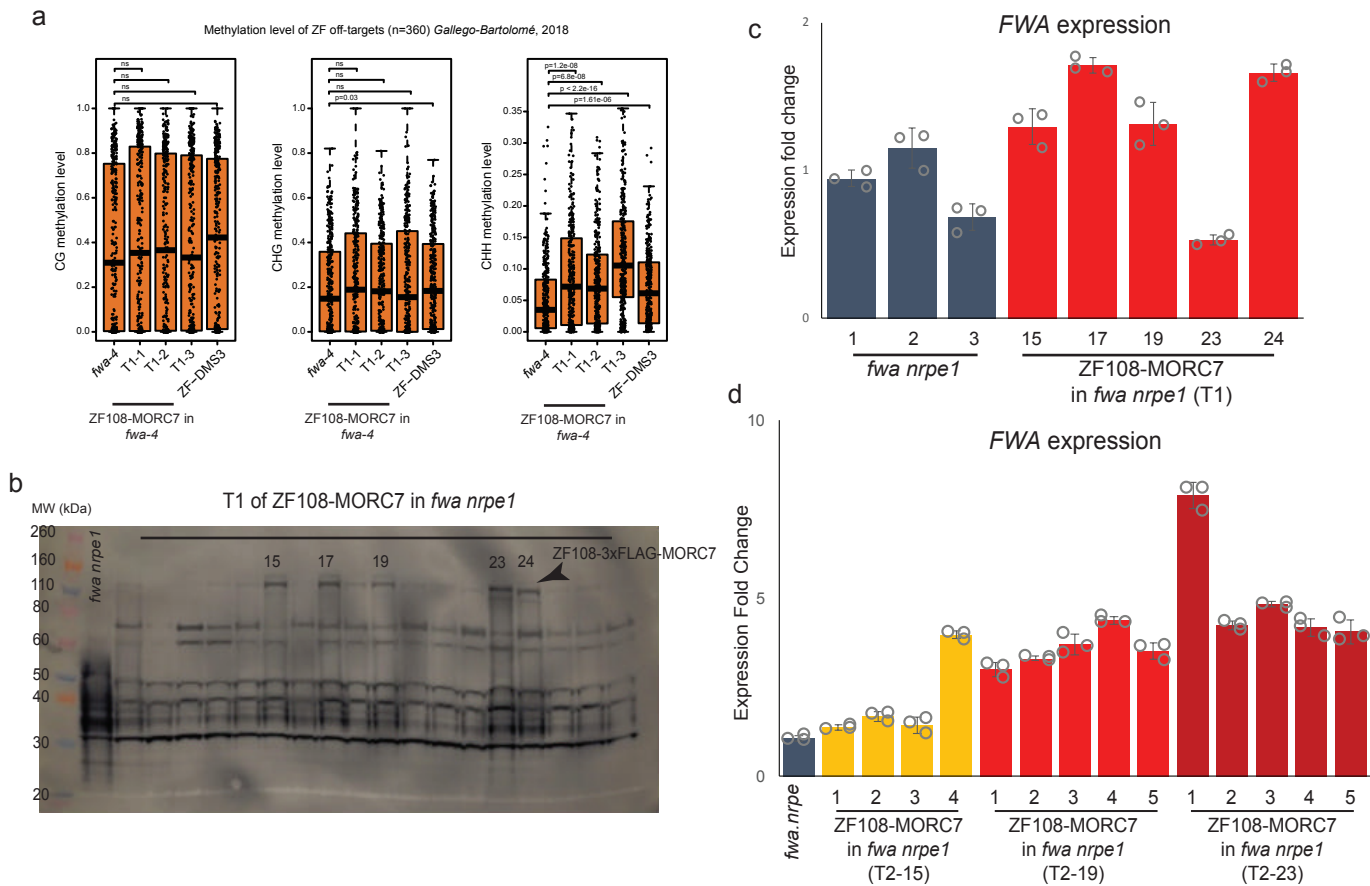

**Supplementary Fig. 3. MORC7 mediated repression on *FWA* is dependent on RdDM, related to Figure 4.** **a** Boxplot showing 360 ZF ectopic sites that gained DNA methylation in the three independent T1 plants showed in Fig 5a. Wilcoxon test was used to determine significance. (ns: p value > 0.05). **b** anti-FLAG western blot showing the expression of ZF108-3xFLAG-MORC7 in the T1 plants displayed in **a**. Arrow indicates the band with expected size. T1 lines with their corresponding numbers were chosen for further analysis. **c** qRT-PCR analysis showing *FWA* expression level relative to *fwa nrpe1* in five independent T1 plants. Error bars represent the mean  $\pm$  s.d. of 3 technical replicates. **d** qRT-PCR analysis showing *FWA* expression level relative to *fwa nrpe1* in the T2 progenies of three T1 plants. Error bars represent the mean  $\pm$  s.d. of 3 technical replicates.

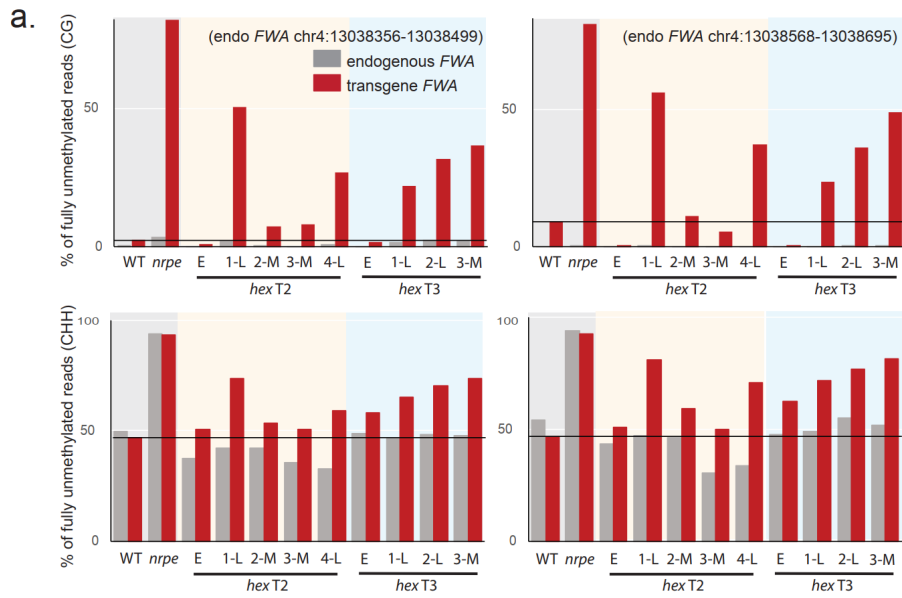

**b.**

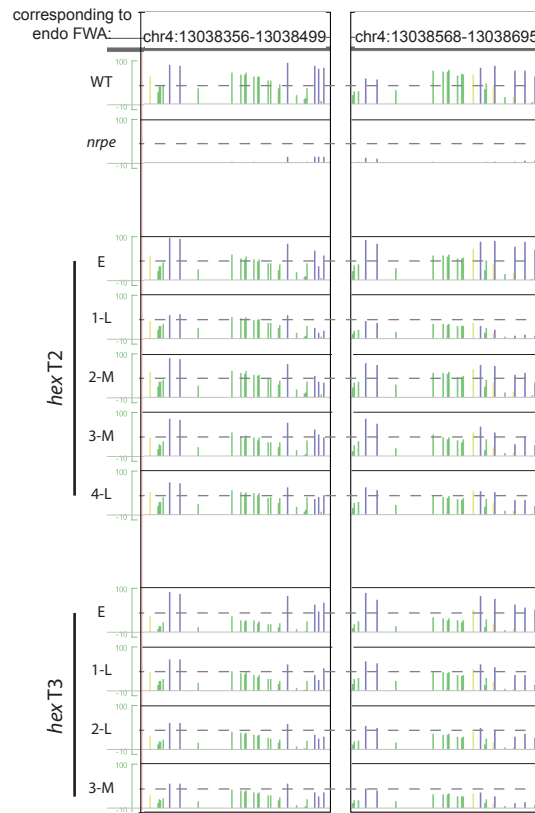

**Supplementary Fig. 4. Establishment of DNA methylation is attenuated over *FWA* transgene.**

**a** Percentage of fully CG unmethylated reads (upper panels) or fully CHH unmethylated reads (lower panels) from the endogenous *FWA* (grey) and *FWA* transgene (red) over two regions within the promoter. The dark lines indicate the levels of fully unmethylated *FWA* transgene in WT. E: early flowering; M: Intermediate flowering; L: late flowering. **b** Methylation tracks of the *FWA* transgene over the same regions as in a. CG:blue; CHG, yellow; CHH, green.

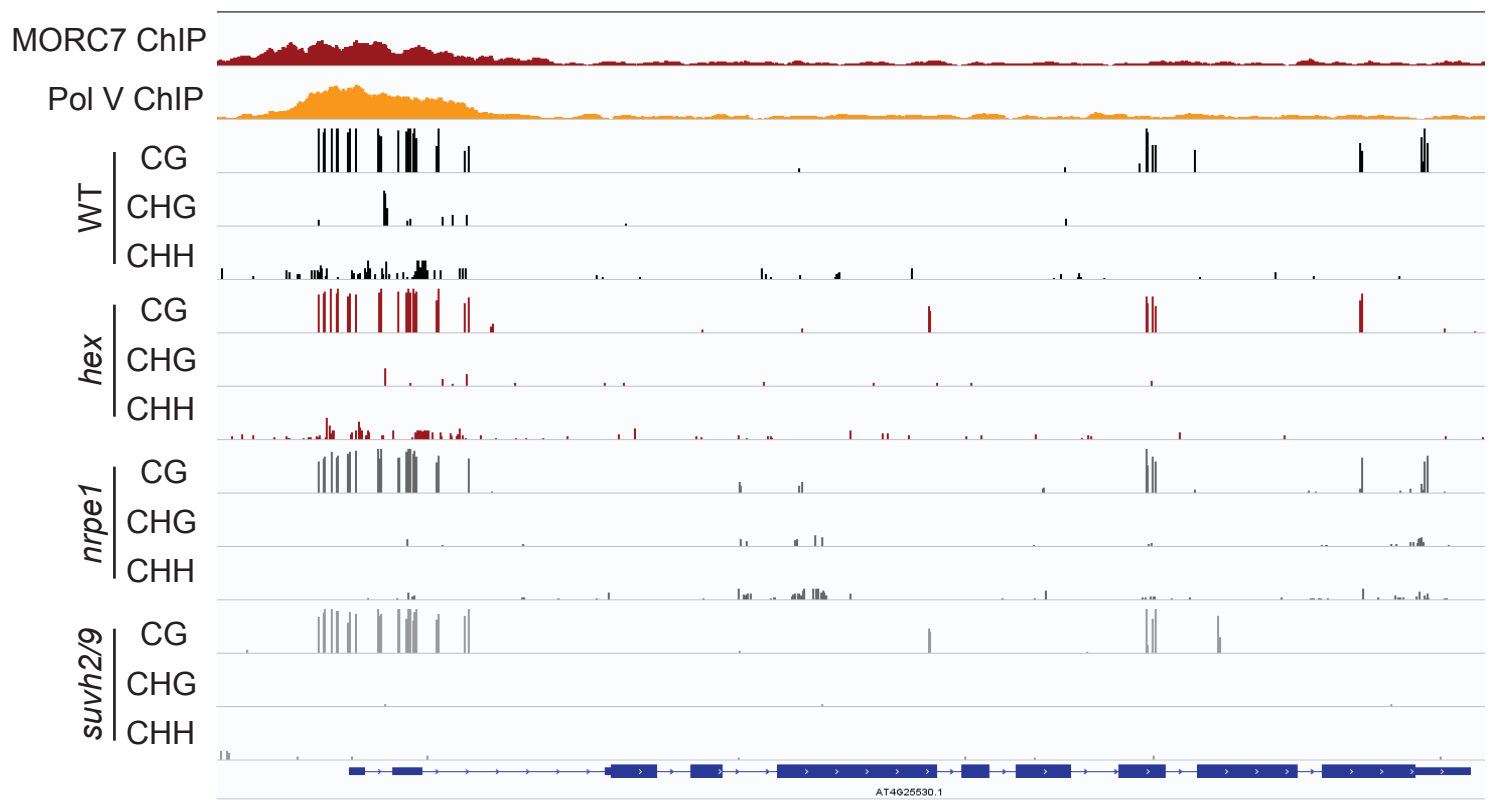

**Supplementary Fig. 5. Methylation over endogenous *FWA* promoter is not affected in *hex*, related to Figure 5.** Screenshot of MORC7 ChIP seq (crimson), Pol V ChIP (orange) over *FWA* locus (AT4G25530) as well as DNA methylation level in WT (black), *hex* (crimson), *nrpe1* (dark grey) and *suvh2/9* (light grey) in CG, CHG and CHH context.

## Supplementary Table 1: Primers used in this study

### Genotyping primers:

|                                    |                              |                                 |
|------------------------------------|------------------------------|---------------------------------|
| <i>morc1-2</i><br>SAIL_893_B06     | TTGCAGTTTGAACCAAATC          | TGAGTTTTGACGACGATGATG           |
| <i>morc2-1</i><br>SALK_072774<br>C | CTACTCAGAGCGTTGGCATTG        | GTTGTAGCTGTATGGGGCTTG           |
| <i>morc4-1</i><br>GK-249F08        | TCAGGAAAGATTTACGAATTG        | ACCTGCAGAACTTCCCAATC            |
| <i>morc5-1</i><br>SALK_049050<br>C | GTTGGGATAGATAAGGCGACC        | TGTCGAGAAATCGTTCCTTTG           |
| <i>morc6-3</i><br>GABI_599B06      | ACATCTTCCAATGGCTGAATC        | GCTGGTGTCACTTCTTCATCC           |
| <i>morc7-1</i><br>SALK_051729      | GTCGAAAGGATGTGAGAAACG        | TTCCATTCAATTGCTTGGTTC           |
| <i>nrpe1-11</i><br>SALK_029919     | ATTTCTTCTTTGATGGGGGAG        | TGTCGTGGATATGACCATTG            |
| <i>nrpd1-4</i><br>SALK_083051      | TGGGTTTGCCATTTTCATATC        | GCATGCTTGAGTAAAAGGTGC           |
| <i>suvh2</i><br>SALK_079574        | GCCCAGGTGTTGTTTCTGTC         | CCATATCGCTCCTCCGTCTA            |
| <i>suvh9</i><br>SALK_048033        | CACACTAGTAGCTATTGGCTCCCCATTA | TCTCTGATAAACTCGTCAAACCCATTTCG   |
| <i>dms3-4/idn1-1</i>               | CTGCCTTGAAAACCTGAGGTAC       | TCTGATAAGATGCATTCCATGG          |
| <i>met1-3</i><br>CS16394           | GATTGTGTCTCTACTACAGAGGC      | GTAAAGCTCATTCATAGCCTTGC         |
| <i>nrpe1-1</i>                     | CGTGGCATCATGAAACATTCACTGC    | CCATCTGATGCTCTATCTTTGATTGAGATGT |

### BS PCR:

|                                            |                                   |                                             |
|--------------------------------------------|-----------------------------------|---------------------------------------------|
| FWA region 1<br>chr4:13038356-<br>13038499 | CTCATATATACCTTATCCCATTCAACATTCATA | AAGATYTGATATTTGGYTGGAAAAAAYAATAA<br>TAAT    |
| FWA region 2<br>chr4:13038568-<br>13038695 | CRCTCTTTATCCCATTCAACATTCATAC      | TTTGGTTGAAAAAATAATAAAAAATTTGATTGT<br>YAGTAT |

### Cloning primers:

| Primer  | Description                                               | Sequence                                                    |
|---------|-----------------------------------------------------------|-------------------------------------------------------------|
| JP22356 | N terminal ZF infusion into pDT Forward                   | AAAGACCGGTCAATTGGACGTCATGGTTGGGTACC<br>AACAAATGG            |
| JP22357 | ZF-linker-DMS3 (overlap Reverse)                          | GATACATCCCACCAGAGCCTCCGAGTCCGGTGTGA<br>GTCCTTTG             |
| JP22358 | ZF-linker-MORC7 (overlap Forward)                         | AAAGGACTCACACCGGACTCGGAGGCTCTGGTGG<br>GATGGACAACAGTATTCACGT |
| JP22359 | DMS3 infupDT infusion into pDT Reverse<br>(no stop codon) | GAACGATTTAATTAATTAGACGTCTCATCTGGGTGT<br>GTTCAATTGG          |

**qPCR primers:**

| Description                    | Forward primer           | Reverse primer         |
|--------------------------------|--------------------------|------------------------|
| McrBC over <i>FWA</i> promoter | TTGGGTTTAGTGTTTACTTG     | GAATGTTGAATGGGATAAGGTA |
| <i>FWA</i> expression          | TTAGATCCAAAGGAGTATCAAAG  | CTTTGGTACCAGCGGAGA     |
| <i>IPP2</i> expression         | GTATGAGTTGCTTCTCCAGCAAAG | GAGGATGGCTGCAACAAGTGT  |
