# Supplementary material for: Arabidopsis MORC proteins function in the efficient establishment of RNA directed DNA methylation
Source: PubMed Central journal article supplement (PMC8277788; doi:10.1038/s41467-021-24553-3), 2021-07-13
Supplement: 41467_2021_24553_MOESM2_ESM.pdf [file 41467_2021_24553_MOESM2_ESM.pdf]

## Reporting Summary

Nature Research wishes to improve the reproducibility of the work that we publish. This form provides structure for consistency and transparency in reporting. For further information on Nature Research policies, see our [Editorial Policies](#) and the [Editorial Policy Checklist](#).

### Statistics

For all statistical analyses, confirm that the following items are present in the figure legend, table legend, main text, or Methods section.

n/a Confirmed

- The exact sample size ( $n$ ) for each experimental group/condition, given as a discrete number and unit of measurement
- A statement on whether measurements were taken from distinct samples or whether the same sample was measured repeatedly
- The statistical test(s) used AND whether they are one- or two-sided  
*Only common tests should be described solely by name; describe more complex techniques in the Methods section.*
- A description of all covariates tested
- A description of any assumptions or corrections, such as tests of normality and adjustment for multiple comparisons
- A full description of the statistical parameters including central tendency (e.g. means) or other basic estimates (e.g. regression coefficient) AND variation (e.g. standard deviation) or associated estimates of uncertainty (e.g. confidence intervals)
- For null hypothesis testing, the test statistic (e.g.  $F$ ,  $t$ ,  $r$ ) with confidence intervals, effect sizes, degrees of freedom and  $P$  value noted  
*Give  $P$  values as exact values whenever suitable.*
- For Bayesian analysis, information on the choice of priors and Markov chain Monte Carlo settings
- For hierarchical and complex designs, identification of the appropriate level for tests and full reporting of outcomes
- Estimates of effect sizes (e.g. Cohen's  $d$ , Pearson's  $r$ ), indicating how they were calculated

*Our web collection on [statistics for biologists](#) contains articles on many of the points above.*

### Software and code

Policy information about [availability of computer code](#)

Data collection No software was used for data collection.

Data analysis

ChIP-seq

Raw reads were aligned to the Arabidopsis reference genome (TAIR10) with Bowtie2 (v2.1.0), allowing only uniquely mapped reads with perfect matches. Duplicated reads were removed with Samtools (v1.9). Peaks were called using MACS2 (v2.1.1). To increase sequencing depth, three independent ChIPs of MORC7 in wild type and two independent MORC7 ChIPs in RdDM mutants were pooled for peak calling.

Whole Genome Bisulfite Sequencing (BS-seq) and analysis.

BS-seq reads were mapped to TAIR10 reference genome by bsmep (v2.90) with allowing 2 mismatches and 1 best hit (-v 2 -w 1). Reads with three or more consecutively methylated CHH sites were considered as non-converted reads and removed from the analyses. DNA methylation levels were calculated by #C/(#C + #T). Differential Methylated Regions (DMRs) were called by methdiff function with every 100bp bin for where the difference in CG, CHG, and CHH methylation are at least 0.4, 0.2, and 0.1, respectively.

met1 RNA seq analysis.

Cleaned short reads were aligned to reference genome tair10 by Bowtie2 (v2.1.0), and expression abundance was calculated by RSEM (v1.3.1) with default parameters.

For manuscripts utilizing custom algorithms or software that are central to the research but not yet described in published literature, software must be made available to editors and reviewers. We strongly encourage code deposition in a community repository (e.g. GitHub). See the Nature Research [guidelines for submitting code & software](#) for further information.

## Data

Policy information about [availability of data](#)

All manuscripts must include a [data availability statement](#). This statement should provide the following information, where applicable:

- Accession codes, unique identifiers, or web links for publicly available datasets
- A list of figures that have associated raw data
- A description of any restrictions on data availability

<https://www.ncbi.nlm.nih.gov/geo/query/acc.cgi?acc=GSE160285>

Link to Figure 1, 2 and 3;

To review GEO accession GSE160285:

Go to <https://www.ncbi.nlm.nih.gov/geo/query/acc.cgi?acc=GSE160285>

Enter token gjazeqymhxqzcv into the box

## Field-specific reporting

Please select the one below that is the best fit for your research. If you are not sure, read the appropriate sections before making your selection.

Life sciences  Behavioural & social sciences  Ecological, evolutionary & environmental sciences

For a reference copy of the document with all sections, see [nature.com/documents/nr-reporting-summary-flat.pdf](https://www.nature.com/documents/nr-reporting-summary-flat.pdf)

## Life sciences study design

All studies must disclose on these points even when the disclosure is negative.

|                 |                                                                                                                              |
|-----------------|------------------------------------------------------------------------------------------------------------------------------|
| Sample size     | No sample size calculation was performed.                                                                                    |
| Data exclusions | No data exclusion in the study.                                                                                              |
| Replication     | Three replicates for MORC7 flag CHIP-seq. Two replicates for flag CHIP-seq in mutants. Three replicates for RNA-seq samples. |
| Randomization   | For all experiments, treatment and control samples were grown side by side, each replicate on separate plate.                |
| Blinding        | No blinding needed.                                                                                                          |

## Behavioural & social sciences study design

All studies must disclose on these points even when the disclosure is negative.

|                   |                                                                                                                                                                                                                                                                                                                                                                                                                                                                                 |
|-------------------|---------------------------------------------------------------------------------------------------------------------------------------------------------------------------------------------------------------------------------------------------------------------------------------------------------------------------------------------------------------------------------------------------------------------------------------------------------------------------------|
| Study description | Briefly describe the study type including whether data are quantitative, qualitative, or mixed-methods (e.g. qualitative cross-sectional, quantitative experimental, mixed-methods case study).                                                                                                                                                                                                                                                                                 |
| Research sample   | State the research sample (e.g. Harvard university undergraduates, villagers in rural India) and provide relevant demographic information (e.g. age, sex) and indicate whether the sample is representative. Provide a rationale for the study sample chosen. For studies involving existing datasets, please describe the dataset and source.                                                                                                                                  |
| Sampling strategy | Describe the sampling procedure (e.g. random, snowball, stratified, convenience). Describe the statistical methods that were used to predetermine sample size OR if no sample-size calculation was performed, describe how sample sizes were chosen and provide a rationale for why these sample sizes are sufficient. For qualitative data, please indicate whether data saturation was considered, and what criteria were used to decide that no further sampling was needed. |
| Data collection   | Provide details about the data collection procedure, including the instruments or devices used to record the data (e.g. pen and paper, computer, eye tracker, video or audio equipment) whether anyone was present besides the participant(s) and the researcher, and whether the researcher was blind to experimental condition and/or the study hypothesis during data collection.                                                                                            |
| Timing            | Indicate the start and stop dates of data collection. If there is a gap between collection periods, state the dates for each sample cohort.                                                                                                                                                                                                                                                                                                                                     |
| Data exclusions   | If no data were excluded from the analyses, state so OR if data were excluded, provide the exact number of exclusions and the rationale behind them, indicating whether exclusion criteria were pre-established.                                                                                                                                                                                                                                                                |
| Non-participation | State how many participants dropped out/declined participation and the reason(s) given OR provide response rate OR state that no participants dropped out/declined participation.                                                                                                                                                                                                                                                                                               |

## Randomization

If participants were not allocated into experimental groups, state so OR describe how participants were allocated to groups, and if allocation was not random, describe how covariates were controlled.

## Ecological, evolutionary & environmental sciences study design

All studies must disclose on these points even when the disclosure is negative.

## Study description

Briefly describe the study. For quantitative data include treatment factors and interactions, design structure (e.g. factorial, nested, hierarchical), nature and number of experimental units and replicates.

## Research sample

Describe the research sample (e.g. a group of tagged *Passer domesticus*, all *Stenocereus thurberi* within Organ Pipe Cactus National Monument), and provide a rationale for the sample choice. When relevant, describe the organism taxa, source, sex, age range and any manipulations. State what population the sample is meant to represent when applicable. For studies involving existing datasets, describe the data and its source.

## Sampling strategy

Note the sampling procedure. Describe the statistical methods that were used to predetermine sample size OR if no sample-size calculation was performed, describe how sample sizes were chosen and provide a rationale for why these sample sizes are sufficient.

## Data collection

Describe the data collection procedure, including who recorded the data and how.

## Timing and spatial scale

Indicate the start and stop dates of data collection, noting the frequency and periodicity of sampling and providing a rationale for these choices. If there is a gap between collection periods, state the dates for each sample cohort. Specify the spatial scale from which the data are taken

## Data exclusions

If no data were excluded from the analyses, state so OR if data were excluded, describe the exclusions and the rationale behind them, indicating whether exclusion criteria were pre-established.

## Reproducibility

Describe the measures taken to verify the reproducibility of experimental findings. For each experiment, note whether any attempts to repeat the experiment failed OR state that all attempts to repeat the experiment were successful.

## Randomization

Describe how samples/organisms/participants were allocated into groups. If allocation was not random, describe how covariates were controlled. If this is not relevant to your study, explain why.

## Blinding

Describe the extent of blinding used during data acquisition and analysis. If blinding was not possible, describe why OR explain why blinding was not relevant to your study.

Did the study involve field work?  Yes  No

## Field work, collection and transport

## Field conditions

Describe the study conditions for field work, providing relevant parameters (e.g. temperature, rainfall).

## Location

State the location of the sampling or experiment, providing relevant parameters (e.g. latitude and longitude, elevation, water depth).

## Access &amp; import/export

Describe the efforts you have made to access habitats and to collect and import/export your samples in a responsible manner and in compliance with local, national and international laws, noting any permits that were obtained (give the name of the issuing authority, the date of issue, and any identifying information).

## Disturbance

Describe any disturbance caused by the study and how it was minimized.

## Reporting for specific materials, systems and methods

We require information from authors about some types of materials, experimental systems and methods used in many studies. Here, indicate whether each material, system or method listed is relevant to your study. If you are not sure if a list item applies to your research, read the appropriate section before selecting a response.

### Materials & experimental systems

| n/a                                 | Involvement in the study                               |
|-------------------------------------|--------------------------------------------------------|
| <input type="checkbox"/>            | <input checked="" type="checkbox"/> Antibodies         |
| <input checked="" type="checkbox"/> | <input type="checkbox"/> Eukaryotic cell lines         |
| <input checked="" type="checkbox"/> | <input type="checkbox"/> Palaeontology and archaeology |
| <input checked="" type="checkbox"/> | <input type="checkbox"/> Animals and other organisms   |
| <input checked="" type="checkbox"/> | <input type="checkbox"/> Human research participants   |
| <input checked="" type="checkbox"/> | <input type="checkbox"/> Clinical data                 |
| <input checked="" type="checkbox"/> | <input type="checkbox"/> Dual use research of concern  |

### Methods

| n/a                                 | Involvement in the study                        |
|-------------------------------------|-------------------------------------------------|
| <input type="checkbox"/>            | <input checked="" type="checkbox"/> ChIP-seq    |
| <input checked="" type="checkbox"/> | <input type="checkbox"/> Flow cytometry         |
| <input checked="" type="checkbox"/> | <input type="checkbox"/> MRI-based neuroimaging |

## Antibodies

|                 |                                                                                                                                                                                                                                                                                                                                                                                                                                                                                                                                                                                                                 |
|-----------------|-----------------------------------------------------------------------------------------------------------------------------------------------------------------------------------------------------------------------------------------------------------------------------------------------------------------------------------------------------------------------------------------------------------------------------------------------------------------------------------------------------------------------------------------------------------------------------------------------------------------|
| Antibodies used | anti-FLAG M2 (Sigma) (7 ul of 1mg/ml per chip; 5000x dilution for WB) ; anti-PolII Ab817 (Abcam) (10 ul per chip); anti-HA11867423001 (Roche) (7 ul per chip)                                                                                                                                                                                                                                                                                                                                                                                                                                                   |
| Validation      | anti-FLAG M2 (Sigma): <a href="https://www.sigmaaldrich.com/catalog/product/sigma/f1804">https://www.sigmaaldrich.com/catalog/product/sigma/f1804</a><br>anti-PolII Ab817 (Abcam): <a href="https://www.abcam.com/rna-polymerase-ii-ctd-repeat-ysptsps-antibody-8wg16-chip-grade-ab817.html">https://www.abcam.com/rna-polymerase-ii-ctd-repeat-ysptsps-antibody-8wg16-chip-grade-ab817.html</a><br>anti-HA11867423001 (Roche): <a href="https://www.sigmaaldrich.com/catalog/product/roche/roahaha?lang=en&amp;region=US">https://www.sigmaaldrich.com/catalog/product/roche/roahaha?lang=en&amp;region=US</a> |

## Eukaryotic cell lines

Policy information about [cell lines](#)

|                                                                   |                                                                                                                                                                                                                                  |
|-------------------------------------------------------------------|----------------------------------------------------------------------------------------------------------------------------------------------------------------------------------------------------------------------------------|
| Cell line source(s)                                               | <i>State the source of each cell line used.</i>                                                                                                                                                                                  |
| Authentication                                                    | <i>Describe the authentication procedures for each cell line used OR declare that none of the cell lines used were authenticated.</i>                                                                                            |
| Mycoplasma contamination                                          | <i>Confirm that all cell lines tested negative for mycoplasma contamination OR describe the results of the testing for mycoplasma contamination OR declare that the cell lines were not tested for mycoplasma contamination.</i> |
| Commonly misidentified lines (See <a href="#">ICLAC</a> register) | <i>Name any commonly misidentified cell lines used in the study and provide a rationale for their use.</i>                                                                                                                       |

## Palaeontology and Archaeology

|                                                                                                                                                 |                                                                                                                                                                                                                                                                                      |
|-------------------------------------------------------------------------------------------------------------------------------------------------|--------------------------------------------------------------------------------------------------------------------------------------------------------------------------------------------------------------------------------------------------------------------------------------|
| Specimen provenance                                                                                                                             | <i>Provide provenance information for specimens and describe permits that were obtained for the work (including the name of the issuing authority, the date of issue, and any identifying information).</i>                                                                          |
| Specimen deposition                                                                                                                             | <i>Indicate where the specimens have been deposited to permit free access by other researchers.</i>                                                                                                                                                                                  |
| Dating methods                                                                                                                                  | <i>If new dates are provided, describe how they were obtained (e.g. collection, storage, sample pretreatment and measurement), where they were obtained (i.e. lab name), the calibration program and the protocol for quality assurance OR state that no new dates are provided.</i> |
| <input type="checkbox"/> Tick this box to confirm that the raw and calibrated dates are available in the paper or in Supplementary Information. |                                                                                                                                                                                                                                                                                      |
| Ethics oversight                                                                                                                                | <i>Identify the organization(s) that approved or provided guidance on the study protocol, OR state that no ethical approval or guidance was required and explain why not.</i>                                                                                                        |

Note that full information on the approval of the study protocol must also be provided in the manuscript.

## Animals and other organisms

Policy information about [studies involving animals](#); [ARRIVE guidelines](#) recommended for reporting animal research

|                         |                                                                                                                                                                                                                                                                                                                                                               |
|-------------------------|---------------------------------------------------------------------------------------------------------------------------------------------------------------------------------------------------------------------------------------------------------------------------------------------------------------------------------------------------------------|
| Laboratory animals      | <i>For laboratory animals, report species, strain, sex and age OR state that the study did not involve laboratory animals.</i>                                                                                                                                                                                                                                |
| Wild animals            | <i>Provide details on animals observed in or captured in the field; report species, sex and age where possible. Describe how animals were caught and transported and what happened to captive animals after the study (if killed, explain why and describe method; if released, say where and when) OR state that the study did not involve wild animals.</i> |
| Field-collected samples | <i>For laboratory work with field-collected samples, describe all relevant parameters such as housing, maintenance, temperature, photoperiod and end-of-experiment protocol OR state that the study did not involve samples collected from the field.</i>                                                                                                     |
| Ethics oversight        | <i>Identify the organization(s) that approved or provided guidance on the study protocol, OR state that no ethical approval or guidance was required and explain why not.</i>                                                                                                                                                                                 |

Note that full information on the approval of the study protocol must also be provided in the manuscript.

## Human research participants

Policy information about [studies involving human research participants](#)

|                            |                                                                                                                                                                                                                                                                                                                                      |
|----------------------------|--------------------------------------------------------------------------------------------------------------------------------------------------------------------------------------------------------------------------------------------------------------------------------------------------------------------------------------|
| Population characteristics | <i>Describe the covariate-relevant population characteristics of the human research participants (e.g. age, gender, genotypic information, past and current diagnosis and treatment categories). If you filled out the behavioural &amp; social sciences study design questions and have nothing to add here, write "See above."</i> |
| Recruitment                | <i>Describe how participants were recruited. Outline any potential self-selection bias or other biases that may be present and how these are likely to impact results.</i>                                                                                                                                                           |
| Ethics oversight           | <i>Identify the organization(s) that approved the study protocol.</i>                                                                                                                                                                                                                                                                |

Note that full information on the approval of the study protocol must also be provided in the manuscript.

## Clinical data

Policy information about [clinical studies](#)

All manuscripts should comply with the ICMJE [guidelines for publication of clinical research](#) and a completed [CONSORT checklist](#) must be included with all submissions.

|                             |                                                                                                                                                |
|-----------------------------|------------------------------------------------------------------------------------------------------------------------------------------------|
| Clinical trial registration | <input type="text" value="Provide the trial registration number from ClinicalTrials.gov or an equivalent agency."/>                            |
| Study protocol              | <input type="text" value="Note where the full trial protocol can be accessed OR if not available, explain why."/>                              |
| Data collection             | <input type="text" value="Describe the settings and locales of data collection, noting the time periods of recruitment and data collection."/> |
| Outcomes                    | <input type="text" value="Describe how you pre-defined primary and secondary outcome measures and how you assessed these measures."/>          |

## Dual use research of concern

Policy information about [dual use research of concern](#)

### Hazards

Could the accidental, deliberate or reckless misuse of agents or technologies generated in the work, or the application of information presented in the manuscript, pose a threat to:

| No                       | Yes                      |
|--------------------------|--------------------------|
| <input type="checkbox"/> | <input type="checkbox"/> |
| <input type="checkbox"/> | <input type="checkbox"/> |
| <input type="checkbox"/> | <input type="checkbox"/> |
| <input type="checkbox"/> | <input type="checkbox"/> |
| <input type="checkbox"/> | <input type="checkbox"/> |

### Experiments of concern

Does the work involve any of these experiments of concern:

| No                       | Yes                      |
|--------------------------|--------------------------|
| <input type="checkbox"/> | <input type="checkbox"/> |
| <input type="checkbox"/> | <input type="checkbox"/> |
| <input type="checkbox"/> | <input type="checkbox"/> |
| <input type="checkbox"/> | <input type="checkbox"/> |
| <input type="checkbox"/> | <input type="checkbox"/> |
| <input type="checkbox"/> | <input type="checkbox"/> |
| <input type="checkbox"/> | <input type="checkbox"/> |
| <input type="checkbox"/> | <input type="checkbox"/> |
| <input type="checkbox"/> | <input type="checkbox"/> |

## ChIP-seq

### Data deposition

- Confirm that both raw and final processed data have been deposited in a public database such as [GEO](#).
- Confirm that you have deposited or provided access to graph files (e.g. BED files) for the called peaks.

|                                                                    |                                                                                                                                                                                                                                                                                                                                                                                  |
|--------------------------------------------------------------------|----------------------------------------------------------------------------------------------------------------------------------------------------------------------------------------------------------------------------------------------------------------------------------------------------------------------------------------------------------------------------------|
| Data access links<br><i>May remain private before publication.</i> | <input type="text" value="To review GEO accession GSE160285:&lt;br/&gt;Go to https://www.ncbi.nlm.nih.gov/geo/query/acc.cgi?acc=GSE160285&lt;br/&gt;Enter token gjazeqymhxqvzcv into the box"/>                                                                                                                                                                                  |
| Files in database submission                                       | <input type="text" value="MORC4-FLAG_ChIPseq_rep-1.fastq.gz&lt;br/&gt;MORC4-FLAG_ChIPseq_rep-2.fastq.gz&lt;br/&gt;MORC7-FLAG_ChIPseq_rep-1.fastq.gz&lt;br/&gt;MORC7-FLAG_ChIPseq_rep-2.fastq.gz&lt;br/&gt;MORC7-FLAG_ChIPseq_rep-3.fastq.gz&lt;br/&gt;WT-FLAG_ChIPseq_rep-1.fastq.gz&lt;br/&gt;WT-FLAG_ChIPseq_rep-2.fastq.gz&lt;br/&gt;nrpdMORC7-FLAG_ChIPseq_rep-1.fastq.gz"/> |

nrpdMORC7-FLAG\_ChIPseq\_rep-2.fastq.gz  
nrpeMORC7-FLAG\_ChIPseq\_rep-1.fastq.gz  
nrpeMORC7-FLAG\_ChIPseq\_rep-2\_R1.fastq.gz  
nrpeMORC7-FLAG\_ChIPseq\_rep-2\_R2.fastq.gz  
nrpdnrpeMORC7-FLAG\_ChIPseq\_rep-1.fastq.gz  
nrpdnrpeMORC7-FLAG\_ChIPseq\_rep-2.fastq.gz  
dms3MORC7-FLAG\_ChIPseq\_rep-1\_R1.fastq.gz  
dms3MORC7-FLAG\_ChIPseq\_rep-1\_R2.fastq.gz  
cross-generation\_MORC7-FLAG\_antiFLAG.fastq.gz  
cross-generation\_suvh29MORC7-FLAG\_antiFLAG\_F2.fastq.gz  
cross-generation\_suvh29MORC7-FLAG\_antiFLAG\_F3.fastq.gz  
Poll\_ChIP\_in\_WT.fastq.gz  
Poll\_ChIP\_in\_hex.fastq.gz  
ZF-DMS3-HA\_MORC7-FLAG\_antiHA\_ChIP\_R1.fastq.gz  
ZF-DMS3-HA\_MORC7-FLAG\_antiHA\_ChIP\_R2.fastq.gz  
ZF-DMS3-HA\_MORC7-FLAG\_antiFLAG\_ChIP\_R1.fastq.gz  
ZF-DMS3-HA\_MORC7-FLAG\_antiFLAG\_ChIP\_R2.fastq.gz  
MORC7-FLAG\_anti-HA\_ChIP\_R1.fastq.gz  
MORC7-FLAG\_anti-HA\_ChIP\_R2.fastq.gz  
met1MORC7-FLAG\_ChIP\_rep-1.fastq.gz  
met1MORC7-FLAG\_ChIP\_rep-2\_R1.fastq.gz  
met1MORC7-FLAG\_ChIP\_rep-2\_R2.fastq.gz  
MORC7-FLAG\_RNAseq\_rep-1\_R1.fastq.gz  
MORC7-FLAG\_RNAseq\_rep-1\_R2.fastq.gz  
MORC7-FLAG\_RNAseq\_rep-2\_R1.fastq.gz  
MORC7-FLAG\_RNAseq\_rep-2\_R2.fastq.gz  
MORC7-FLAG\_RNAseq\_rep-3\_R1.fastq.gz  
MORC7-FLAG\_RNAseq\_rep-3\_R2.fastq.gz  
met1MORC7-FLAG\_RNAseq\_rep-1\_R1.fastq.gz  
met1MORC7-FLAG\_RNAseq\_rep-1\_R2.fastq.gz  
met1MORC7-FLAG\_RNAseq\_rep-2\_R1.fastq.gz  
met1MORC7-FLAG\_RNAseq\_rep-2\_R2.fastq.gz  
met1MORC7-FLAG\_RNAseq\_rep-3\_R1.fastq.gz  
met1MORC7-FLAG\_RNAseq\_rep-3\_R2.fastq.gz  
morc7-1.fastq.gz  
morc7-2.fastq.gz  
morc7-3.fastq.gz  
met1-morc7-1.fastq.gz  
met1-morc7-2.fastq.gz  
met1-morc7-3.fastq.gz  
MORC4-FLAG\_ChIPseq\_rep-1.bw  
MORC4-FLAG\_ChIPseq\_rep-2.bw  
MORC7-FLAG\_ChIPseq\_rep-1.bw  
MORC7-FLAG\_ChIPseq\_rep-2.bw  
WT\_FLAG\_ChIPseq\_rep-1.bw  
WT\_FLAG\_ChIPseq\_rep-2.bw  
nrpdMORC7-FLAG\_ChIPseq\_rep-1.bw  
nrpdMORC7-FLAG\_ChIPseq\_rep-2.bw  
nrpeMORC7-FLAG\_ChIPseq\_rep-1.bw  
nrpeMORC7-FLAG\_ChIPseq\_rep-2.bw  
nrpdnrpeMORC7-FLAG\_ChIPseq\_rep-1.bw  
nrpdnrpeMORC7-FLAG\_ChIPseq\_rep-2.bw  
dms3MORC7-FLAG\_ChIPseq\_rep-1.bw  
cross-generation\_MORC7-FLAG\_ChIP.bw  
cross-generation\_suvh29MORC7-FLAG\_ChIP\_F2.bw  
cross-generation\_suvh29MORC7-FLAG\_ChIP\_F3.bw  
Poll\_ChIP\_in\_WT.bw  
Poll\_ChIP\_in\_hex.bw  
ZF-DMS3-HA\_MORC7-FLAG\_antiHA\_ChIP.bw  
ZF-DMS3-HA\_MORC7-FLAG\_antiFLAG\_ChIP.bw  
MORC7-FLAG\_anti-HA\_ChIP.bw  
met1MORC7-FLAG\_ChIP\_rep-1.bw  
met1MORC7-FLAG\_ChIP\_rep-2.bw  
MORC7-FLAG\_RNAseq\_rep-1.bw  
MORC7-FLAG\_RNAseq\_rep-2.bw  
MORC7-FLAG\_RNAseq\_rep-3.bw  
met1MORC7-FLAG\_RNAseq\_rep-1.bw  
met1MORC7-FLAG\_RNAseq\_rep-2.bw

```

met1MORC7-FLAG_RNAseq_rep-3.bw
met1-morc7-1_merge_CG.wig
met1-morc7-1_merge_CHG.wig
met1-morc7-1_merge_CHH.wig
met1-morc7-2_merge_CG.wig
met1-morc7-2_merge_CHG.wig
met1-morc7-2_merge_CHH.wig
met1-morc7-3_merge_CG.wig
met1-morc7-3_merge_CHG.wig
met1-morc7-3_merge_CHH.wig
morc7-1_merge_CG.wig
morc7-1_merge_CHG.wig
morc7-1_merge_CHH.wig
morc7-2_merge_CG.wig
morc7-2_merge_CHG.wig
morc7-2_merge_CHH.wig
morc7-3_merge_CG.wig
morc7-3_merge_CHG.wig
morc7-3_merge_CHH.wig
MORC4-FLAG_ChIPseq_rep-1.narrowPeak
MORC4-FLAG_ChIPseq_rep-2.narrowPeak
MORC7-FLAG_ChIPseq_rep-1.narrowPeak
MORC7-FLAG_ChIPseq_rep-2.narrowPeak
MORC7-FLAG_ChIPseq_rep-3.narrowPeak
WT-FLAG_ChIPseq_rep-1.narrowPeak
WT_FLAG_ChIPseq_rep-2.narrowPeak
nrpdMORC7-FLAG_ChIPseq_rep-1.narrowPeak
nrpdMORC7-FLAG_ChIPseq_rep-2.narrowPeak
nrpeMORC7_FLAG_ChIPseq_rep-1.narrowPeak
nrpeMORC7-FLAG_ChIPseq_rep-2.narrowPeak
nrpdnrpeMORC7_FLAG_ChIPseq_rep-1.narrowPeak
nrpdnrpeMORC7_FLAG_ChIPseq_rep-2.narrowPeak
dms3MORC7-FLAG_ChIPseq_rep-1.narrowPeak
ZF-DMS3-HA_MORC7-FLAG_antiHA_ChIPseq_rep-1.narrowPeak
ZF-DMS3-HA_MORC7-FLAG_antiFLAG_ChIPseq_rep-1.narrowPeak
PolII_ChIP_in_WT.narrowPeak
PolII_ChIP_in_hex.narrowPeak
MORC7-anti-HA_ChIPseq_rep-1.narrowPeak
met1MORC-FLAG_ChIP_rep-2.narrowPeak

```

Genome browser session  
(e.g. [UCSC](#))

*Provide a link to an anonymized genome browser session for "Initial submission" and "Revised version" documents only, to enable peer review. Write "no longer applicable" for "Final submission" documents.*

## Methodology

### Replicates

For MORC7 ChIP-Seq experiment, three replicates were performed, along with wild-type Flag control.  
 For MORC4 ChIP-Seq experiment, two replicates were performed, along with wild-type Flag control.  
 For MORC7 ChIP-Seq experiment in met1 mutant background, two replicates were performed.  
 For MORC7 ChIP-Seq experiment in nrpd1 mutant background, two replicates were performed.  
 For MORC7 ChIP-Seq experiment in nrpe1 mutant background, two replicates were performed.  
 For MORC7 ChIP-Seq experiment in nrpd1nrpe1 mutant background, two replicates were performed.  
 For MORC7 ChIP-Seq experiment in dms3 mutant background, two replicates were performed.  
 For MORC7 ChIP-Seq experiment in ZF-DMS3t background, single replicate was performed with anti-flag.  
 For MORC7 ChIP-Seq experiment in ZF-DMS3t background, single replicate was performed with anti-HA.  
 For MORC7 ChIP-Seq cross generation experiment in wild type background, single replicate was performed.  
 For MORC7 ChIP-Seq cross generation F2 experiment in suvh29 mutant background, single replicate was performed.  
 For MORC7 ChIP-Seq cross generation F3 experiment in suvh29 mutant background, single replicate was performed.  
 For Pol II ChIP-Seq experiment in wild and morc hex mutant background, single replicate was performed.

### Sequencing depth

Sample name: Total number of reads; Uniquely mapped reads; length of reads; SE/PE  
 MORC4-FLAG\_ChIPseq\_replicate-1: 19637949;19480038; 50 bp; SE  
 MORC4-FLAG\_ChIPseq\_replicate-2: 18994644; 18760802; 50 bp; SE  
 MORC7-FLAG\_ChIPseq\_replicate-1: 18455643; 18179382; 50 bp; SE  
 MORC7-FLAG\_ChIPseq\_replicate-2: 31575610; 31260910; 50 bp; SE  
 MORC7-FLAG\_ChIPseq\_replicate-3: 43350833; 42627669; 50 bp; SE  
 WT\_FLAG\_ChIPseq\_replicate-1 (ChIP input): 27348263; 26323121; 50 bp; SE  
 WT\_FLAG\_ChIPseq\_replicate-2 (ChIP input): 18276593; 18034372; 50 bp; SE

nrpdMORC7-FLAG\_ChIPseq\_replicate-1: 31853097; 31364438; 50 bp; SE  
 nrpdMORC7-FLAG\_ChIPseq\_replicate-2: 41096316; 40473146; 50 bp; SE  
 nrpeMORC7-FLAG\_ChIPseq\_replicate-1: 13960186; 13659738; 50 bp; SE  
 nrpeMORC7-FLAG\_ChIPseq\_replicate-2: 57791484; 55952814; 50 bp; PE  
 nrpdnrpeMORC7-FLAG\_ChIPseq\_replicate-1: 43586677; 43046309; 50 bp; SE  
 nrpdnrpeMORC7-FLAG\_ChIPseq\_replicate-2: 17110287; 16912048; 50 bp; SE  
 dms3MORC7-FLAG\_ChIPseq\_replicate-1: 49844738; 48532489; 50 bp; SE  
 PolII\_ChIP\_in\_WT: 22757591; 22641479; 50 bp; SE  
 PolII\_ChIP\_in\_hex: 23859924; 23722811; 50 bp; SE  
 ZF-DMS3-HA\_MORC7-FLAG\_antiHA\_ChIP:50 bp; PE  
 ZF-DMS3-HA\_MORC7-FLAG\_antiFLAG\_ChIP:50 bp; PE  
 met1MORC7-FLAG\_ChIP\_replicate-1: 126246032; 119109500; 50 bp; SE  
 met1MORC7-FLAG\_ChIP\_replicate-2: 52373576; 50686174; 50 bp; PE

Antibodies anti-FLAG M2 (Sigma) ; anti-PolII Ab817 (Abcam); anti-HA11867423001 (Roche)

Peak calling parameters MACS2: '-f BAM -g 1.3e+8 -q 0.05 --extsize 147'

Data quality All identified peaks in the study were called with a qval threshold of 0.01 ( FDR 1%).

dms3MORC7-FLAG\_ChIPseq\_rep-1.narrowPeak: 9961  
 met1MORC-FLAG\_ChIP\_rep-2.narrowPeak: 12825  
 MORC4-FLAG\_ChIPseq\_rep-1.narrowPeak: 2327  
 MORC4-FLAG\_ChIPseq\_rep-2.narrowPeak: 9814  
 MORC7-FLAG\_ChIPseq\_rep-1.narrowPeak: 8890  
 MORC7-FLAG\_ChIPseq\_rep-2.narrowPeak: 10296  
 MORC7-FLAG\_ChIPseq\_rep-3.narrowPeak: 12730  
 ZF-DMS3-HA\_MORC7-FLAG\_antiFLAG\_ChIPseq\_rep-1.narrowPeak: 16994  
 ZF-DMS3-HA\_MORC7-FLAG\_antiHA\_ChIPseq\_rep-1.narrowPeak: 23539  
 nrpdMORC7-FLAG\_ChIPseq\_rep-1.narrowPeak: 8912  
 nrpdMORC7-FLAG\_ChIPseq\_rep-2.narrowPeak: 10587  
 nrpdnrpeMORC7\_FLAG\_ChIPseq\_rep-1.narrowPeak: 10014  
 nrpdnrpeMORC7\_FLAG\_ChIPseq\_rep-2.narrowPeak: 4994  
 nrpeMORC7-FLAG\_ChIPseq\_rep-2.narrowPeak: 12656  
 nrpeMORC7\_FLAG\_ChIPseq\_rep-1.narrowPeak: 6773  
 PolII\_ChIP\_in\_hex.narrowPeak: 17806  
 PolII\_ChIP\_in\_WT.narrowPeak: 18567  
 WT-FLAG\_ChIPseq\_rep-1.narrowPeak: 3493  
 WT\_FLAG\_ChIPseq\_rep-2.narrowPeak: 1737

Software Bowtie2 (v2.1.0)  
 Samtools (v1.9)  
 MACS2 (v2.1.1)

## Flow Cytometry

### Plots

Confirm that:

- The axis labels state the marker and fluorochrome used (e.g. CD4-FITC).
- The axis scales are clearly visible. Include numbers along axes only for bottom left plot of group (a 'group' is an analysis of identical markers).
- All plots are contour plots with outliers or pseudocolor plots.
- A numerical value for number of cells or percentage (with statistics) is provided.

### Methodology

Sample preparation *Describe the sample preparation, detailing the biological source of the cells and any tissue processing steps used.*

Instrument *Identify the instrument used for data collection, specifying make and model number.*

Software *Describe the software used to collect and analyze the flow cytometry data. For custom code that has been deposited into a community repository, provide accession details.*



Cell population abundance

Describe the abundance of the relevant cell populations within post-sort fractions, providing details on the purity of the samples and how it was determined.

Gating strategy

Describe the gating strategy used for all relevant experiments, specifying the preliminary FSC/SSC gates of the starting cell population, indicating where boundaries between "positive" and "negative" staining cell populations are defined.

Tick this box to confirm that a figure exemplifying the gating strategy is provided in the Supplementary Information.

## Magnetic resonance imaging

### Experimental design

Design type

Indicate task or resting state; event-related or block design.

Design specifications

Specify the number of blocks, trials or experimental units per session and/or subject, and specify the length of each trial or block (if trials are blocked) and interval between trials.

Behavioral performance measures

State number and/or type of variables recorded (e.g. correct button press, response time) and what statistics were used to establish that the subjects were performing the task as expected (e.g. mean, range, and/or standard deviation across subjects).

### Acquisition

Imaging type(s)

Specify: functional, structural, diffusion, perfusion.

Field strength

Specify in Tesla

Sequence &amp; imaging parameters

Specify the pulse sequence type (gradient echo, spin echo, etc.), imaging type (EPI, spiral, etc.), field of view, matrix size, slice thickness, orientation and TE/TR/flip angle.

Area of acquisition

State whether a whole brain scan was used OR define the area of acquisition, describing how the region was determined.

Diffusion MRI

 Used

 Not used

### Preprocessing

Preprocessing software

Provide detail on software version and revision number and on specific parameters (model/functions, brain extraction, segmentation, smoothing kernel size, etc.).

Normalization

If data were normalized/standardized, describe the approach(es): specify linear or non-linear and define image types used for transformation OR indicate that data were not normalized and explain rationale for lack of normalization.

Normalization template

Describe the template used for normalization/transformation, specifying subject space or group standardized space (e.g. original Talairach, MNI305, ICBM152) OR indicate that the data were not normalized.

Noise and artifact removal

Describe your procedure(s) for artifact and structured noise removal, specifying motion parameters, tissue signals and physiological signals (heart rate, respiration).

Volume censoring

Define your software and/or method and criteria for volume censoring, and state the extent of such censoring.

### Statistical modeling & inference

Model type and settings

Specify type (mass univariate, multivariate, RSA, predictive, etc.) and describe essential details of the model at the first and second levels (e.g. fixed, random or mixed effects; drift or auto-correlation).

Effect(s) tested

Define precise effect in terms of the task or stimulus conditions instead of psychological concepts and indicate whether ANOVA or factorial designs were used.

Specify type of analysis:  Whole brain  ROI-based  Both

Statistic type for inference  
(See [Eklund et al. 2016](#))

Specify voxel-wise or cluster-wise and report all relevant parameters for cluster-wise methods.

Correction

Describe the type of correction and how it is obtained for multiple comparisons (e.g. FWE, FDR, permutation or Monte Carlo).

## Models & analysis

- n/a | Involved in the study
- Functional and/or effective connectivity
- Graph analysis
- Multivariate modeling or predictive analysis

Functional and/or effective connectivity

*Report the measures of dependence used and the model details (e.g. Pearson correlation, partial correlation, mutual information).*

Graph analysis

*Report the dependent variable and connectivity measure, specifying weighted graph or binarized graph, subject- or group-level, and the global and/or node summaries used (e.g. clustering coefficient, efficiency, etc.).*

Multivariate modeling and predictive analysis

*Specify independent variables, features extraction and dimension reduction, model, training and evaluation metrics.*
